# Supplementary material
Source: publisher site journal article supplement (https://www.dovepress.com/get_supplementary_file.php?f=474535.docx)
Supplement: Supplementary file 1 [file get_supplementary_file.php]

**Supplement**

Supplementary figure 1: Subject responses to questions about usage frequency of modality in friends and family communication (1) and subject comfort level with modality in friends and family communication (2).


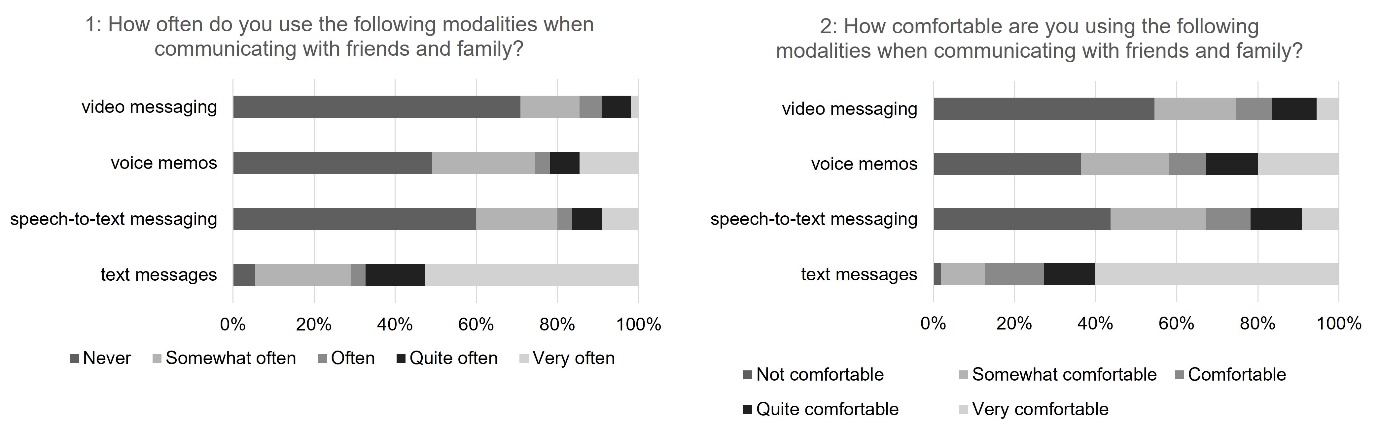
**Supplementary figure 1**

Supplementary figure 2: Subject responses to questions about method preferences for reporting symptoms (1) and device preferences for reporting symptoms (2). Subjects were asked to rank the options.


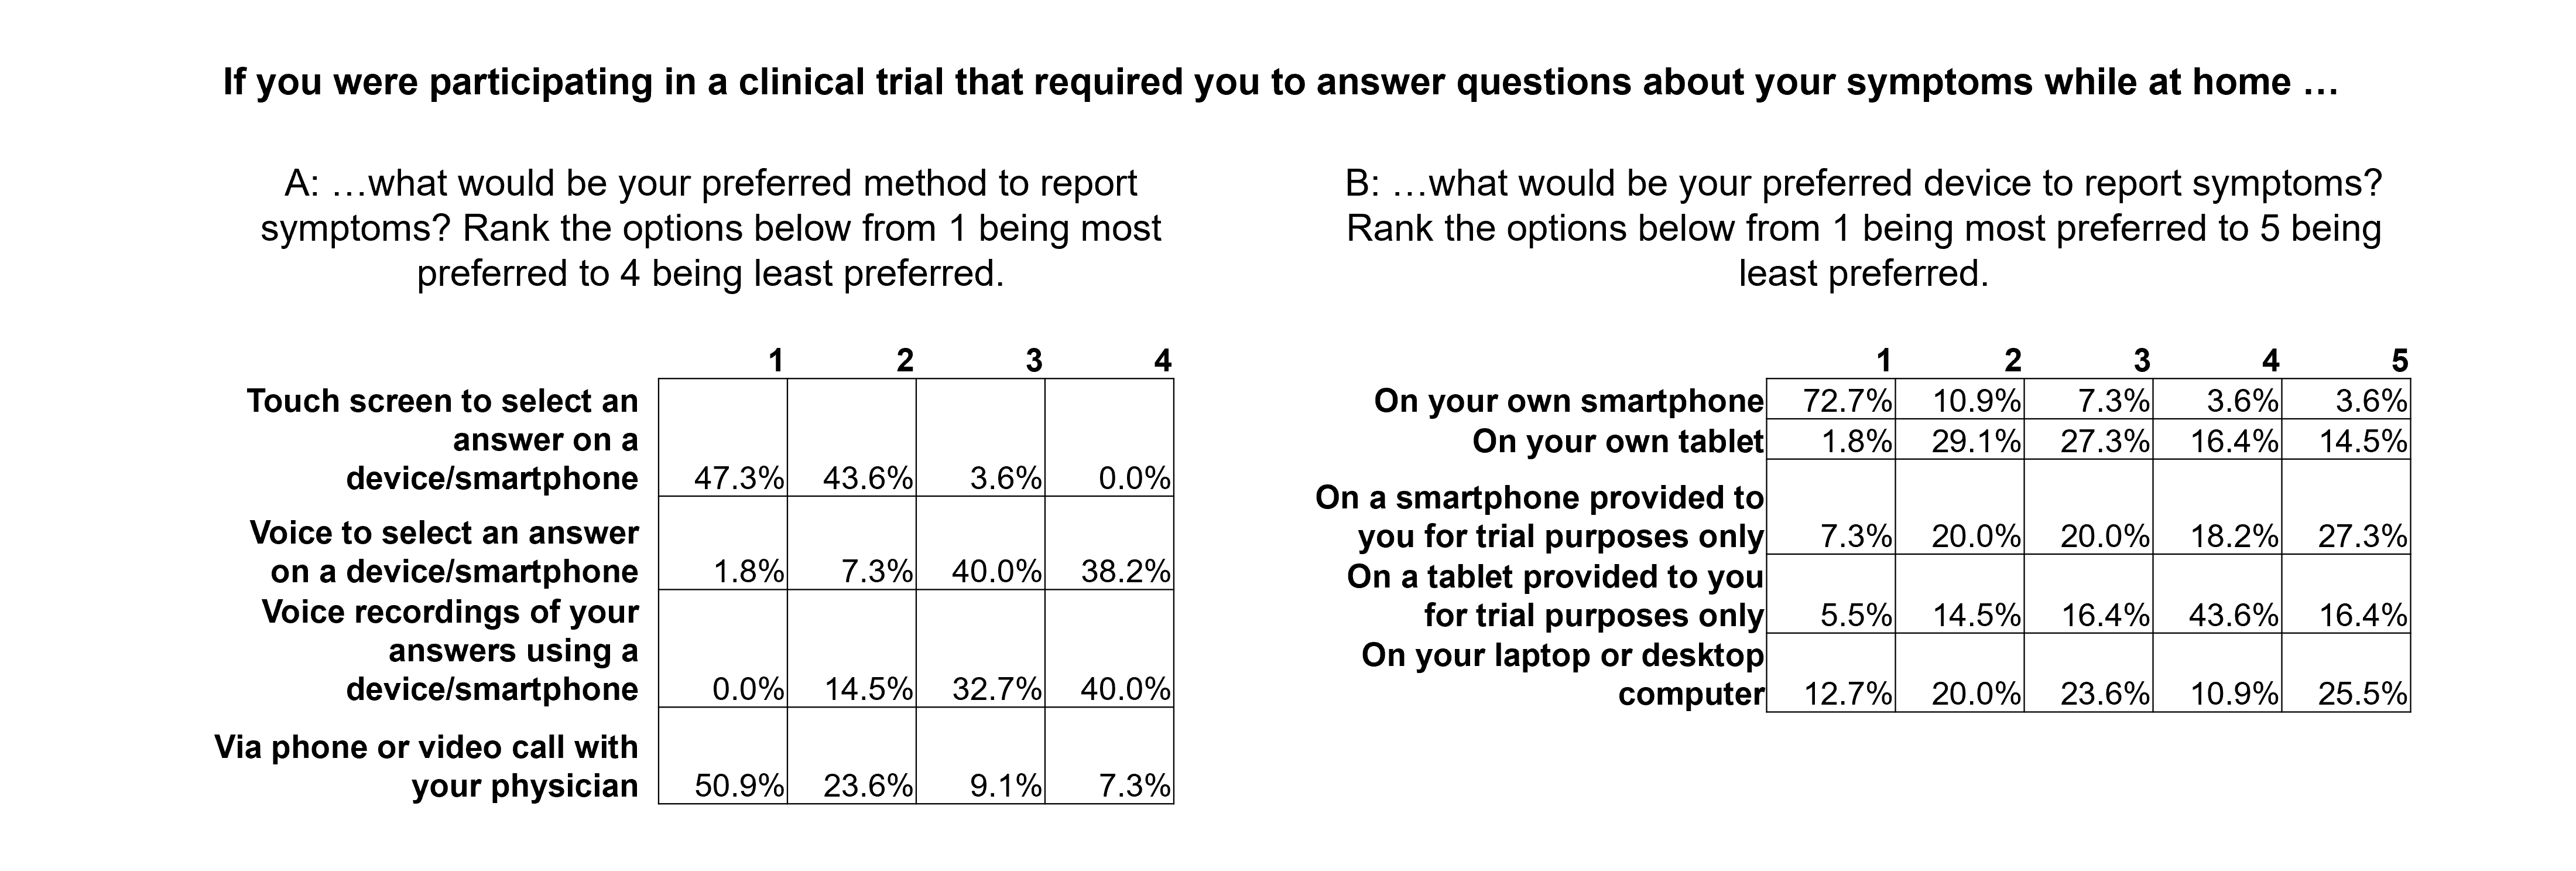


**Supplementary figure 2a and 2b**

Supplementary figure 3: Subject responses to a question about the preferred method for receiving reminders to report symptoms. Subjects were asked to rank the options.


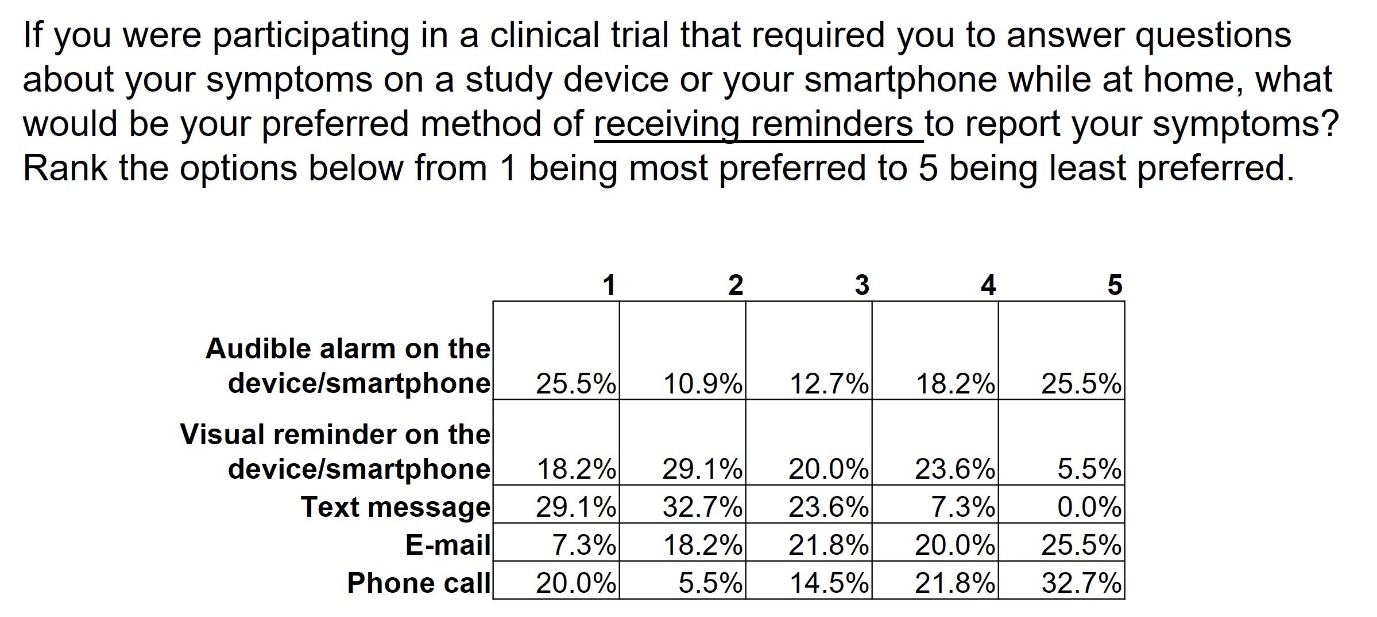
**Supplementary figure 3**
